# Supplementary material for: P22 Prevalence of and Characteristics Associated with Food Security Status Among International College Students
Source: Elsevier journal article supplement (doi:10.1016/j.jneb.2020.04.067), 2020-07-01
Supplement: mmc31 [file mmc31.pdf]

# Prevalence of and Characteristics Associated with Food Security Status Among International College Students

Jessica Soldavini, MPH, RD, LDN<sup>1</sup>; Maureen Berner, PhD<sup>2</sup>

<sup>1</sup>Center for Health Promotion and Disease Prevention and Department of Nutrition, University of North Carolina at Chapel Hill

<sup>2</sup>School of Government, University of North Carolina at Chapel Hill

## Background

- There are over 1.4 million international students studying in the US.<sup>1</sup>
- International students may experience a variety of challenges as they transition to living and studying in a new country and institution.
- Food insecurity refers to a lack of consistent and dependable access to enough food to support an active and healthy life.<sup>2</sup>
- The majority of studies on food insecurity among US college students show higher prevalence rates than the general population.<sup>2,3</sup>
- Studies have found higher rates of food insecurity among international students compared with non-international students attending UNC Chapel Hill.<sup>4,5</sup>
- Past studies have examined characteristics associated with food security status among students, but have not looked specifically at characteristics associated with food security status among international students.<sup>3,4</sup>

## Objective

To estimate the prevalence of and identify characteristics associated with food insecurity among international students at UNC Chapel Hill.

## Methods

- This cross-sectional study used data from 263 international students attending UNC Chapel Hill who completed an online survey in October and November of 2016.
- Food security status was assessed using the 10-item US Adult Food Security Survey Module and students were categorized as having high food security, marginal food security, or food insecurity.
- Self-reported demographics and other student characteristics were assessed.
- Descriptive statistics were calculated. Monte Carlo Estimates for the Exact Test and ANOVA were used to assess statistical significance for the association between food security status and student characteristics.

## Results

**Food Security Status Among International Students**

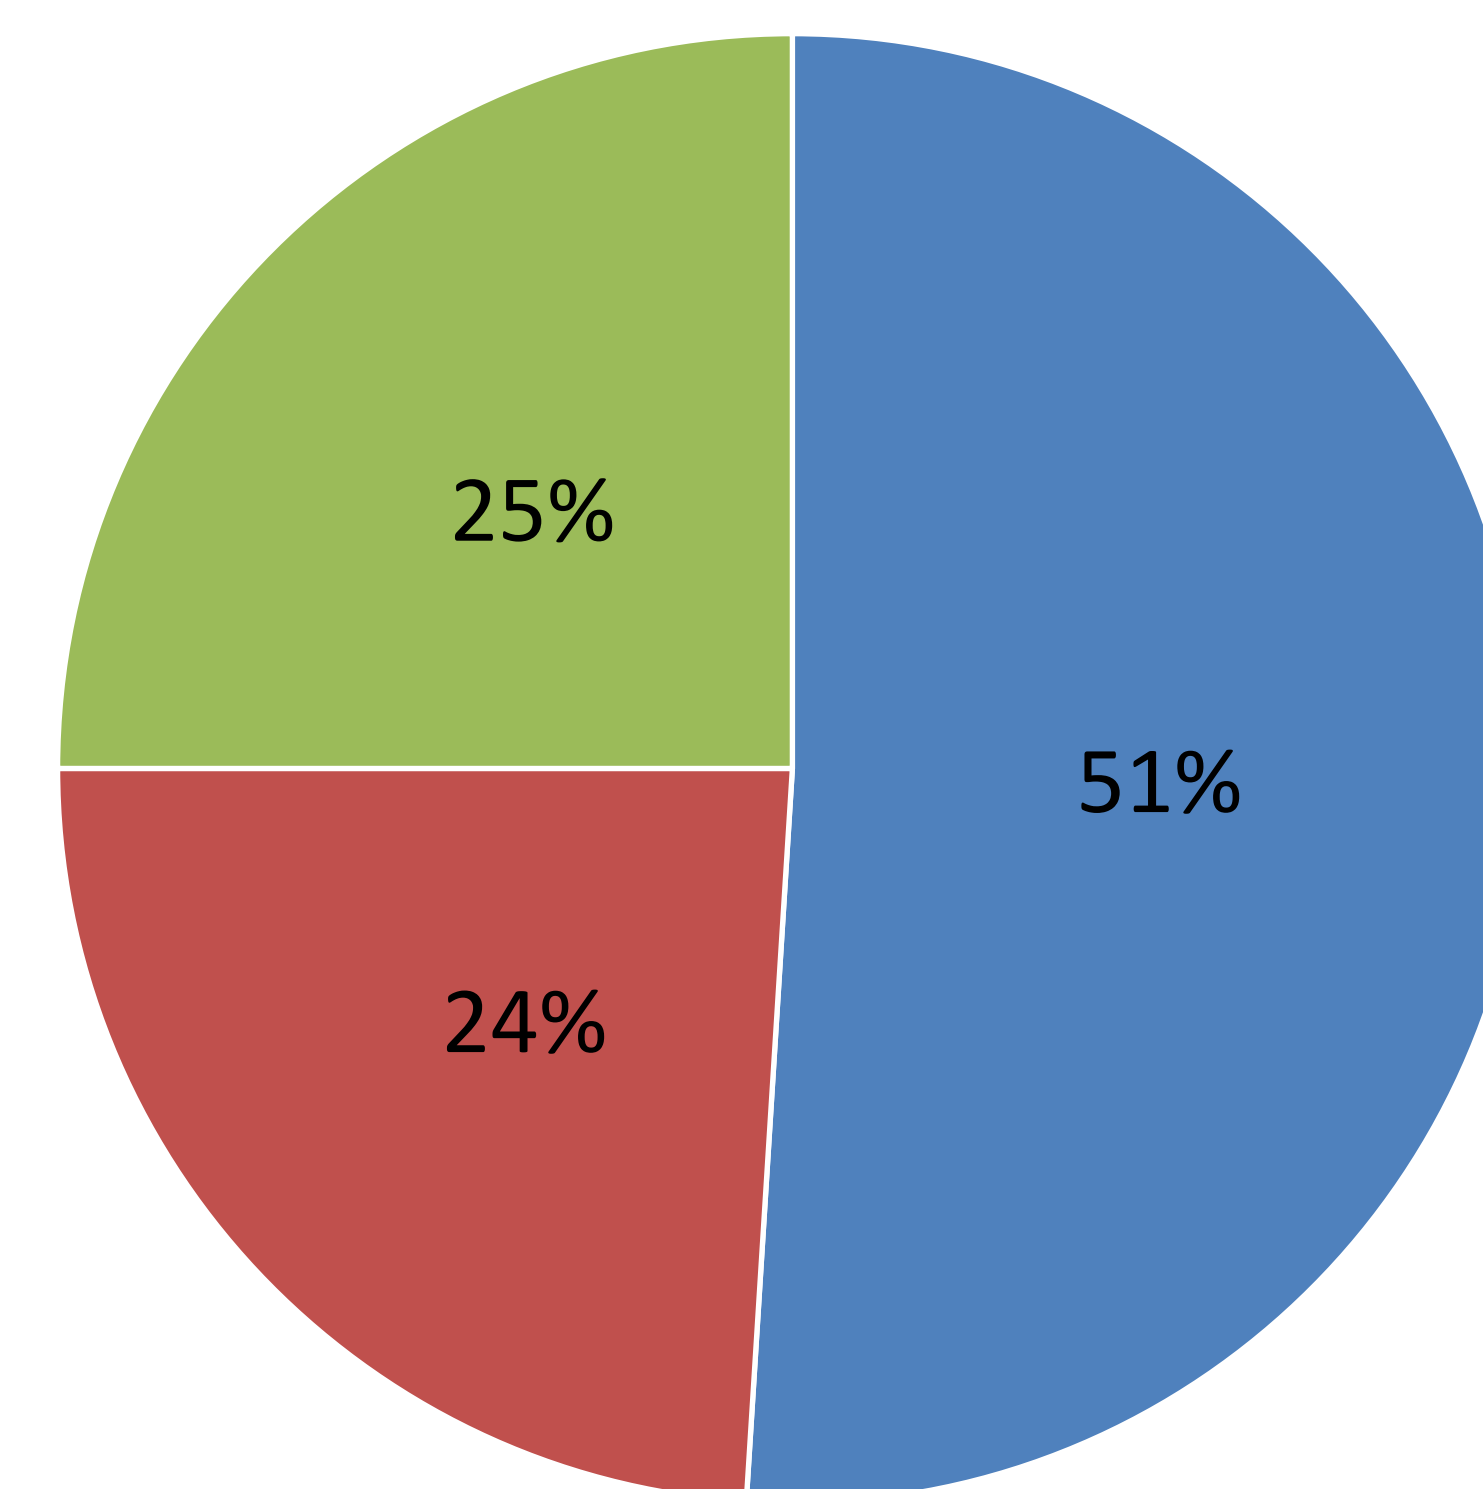

- High Food Security
- Marginal Food Security
- Food Insecurity

**Table 1: Characteristics of International Students by Food Security Status**

|                                 | High Food Security (n=135) | Marginal Food Security (n=63) | Food Insecurity (n=65) | p-value |
|---------------------------------|----------------------------|-------------------------------|------------------------|---------|
| Mean (SD)                       |                            |                               |                        |         |
| Age                             | 25.4 (5.3)                 | 24.4 (4.6)                    | 23.9 (5.4)             | .16     |
| Years in US                     | 2.6 (3.2)                  | 2.2 (2.8)                     | 2.9 (4.2)              | .47     |
| n (%) <sup>1</sup>              |                            |                               |                        |         |
| <b>Gender</b>                   |                            |                               |                        | .03     |
| Female                          | 84 (62)                    | 38 (60)                       | 28 (43)                |         |
| Male                            | 51 (38)                    | 25 (40)                       | 37 (57)                |         |
| <b>Marital Status</b>           |                            |                               |                        | .59     |
| Not Married                     | 106 (79)                   | 51 (81)                       | 55 (85)                |         |
| Married                         | 29 (21)                    | 12 (19)                       | 10 (15)                |         |
| <b>Dependent Children</b>       |                            |                               |                        | .39     |
| No                              | 127 (94)                   | 62 (98)                       | 61 (94)                |         |
| Yes                             | 8 (6)                      | 1 (2)                         | 4 (6)                  |         |
| <b>Year in School</b>           |                            |                               |                        | .01     |
| Freshman                        | 13 (10)                    | 1 (2)                         | 6 (9)                  |         |
| Sophomore                       | 11 (8)                     | 7 (11)                        | 7 (11)                 |         |
| Junior                          | 11 (8)                     | 6 (10)                        | 15 (23)                |         |
| Senior                          | 11 (8)                     | 10 (16)                       | 8 (12)                 |         |
| Graduate                        | 89 (66)                    | 39 (62)                       | 29 (45)                |         |
| <b>Residency</b>                |                            |                               |                        | .34     |
| Off-Campus                      | 87 (64)                    | 37 (59)                       | 35 (54)                |         |
| On-Campus                       | 48 (36)                    | 26 (41)                       | 30 (46)                |         |
| <b>Employment Status</b>        |                            |                               |                        | .77     |
| Unemployed                      | 71 (53)                    | 37 (59)                       | 38 (58)                |         |
| ≥1 Part-time jobs               | 48 (36)                    | 17 (27)                       | 20 (31)                |         |
| Full-time job                   | 16 (12)                    | 9 (14)                        | 7 (11)                 |         |
| <b>Have car</b>                 |                            |                               |                        | .03     |
| No                              | 80 (59)                    | 49 (78)                       | 45 (69)                |         |
| Yes                             | 55 (41)                    | 14 (22)                       | 20 (31)                |         |
| <b>Financial Aid</b>            |                            |                               |                        | .12     |
| No                              | 50 (37)                    | 27 (43)                       | 34 (52)                |         |
| Yes                             | 85 (63)                    | 36 (57)                       | 31 (48)                |         |
| <b>Perceived Health Rating</b>  |                            |                               |                        | .005    |
| Excellent                       | 56 (41)                    | 23 (37)                       | 13 (20)                |         |
| Good                            | 71 (53)                    | 36 (57)                       | 40 (62)                |         |
| Fair/poor                       | 8 (6)                      | 4 (6)                         | 12 (18)                |         |
| <b>Weight Status</b>            |                            |                               |                        | .39     |
| Underweight                     | 8 (6)                      | 8 (13)                        | 6 (9)                  |         |
| Normal weight                   | 93 (69)                    | 39 (62)                       | 47 (72)                |         |
| Overweight                      | 25 (19)                    | 14 (22)                       | 11 (17)                |         |
| Obese                           | 9 (7)                      | 2 (3)                         | 1 (2)                  |         |
| <b>Cooking Frequency</b>        |                            |                               |                        | .05     |
| Never                           | 13 (10)                    | 6 (10)                        | 4 (6)                  |         |
| Sometimes                       | 39 (29)                    | 18 (29)                       | 32 (49)                |         |
| Often                           | 83 (61)                    | 39 (62)                       | 29 (45)                |         |
| <b>Perceived Cooking Skills</b> |                            |                               |                        | .20     |
| Poor                            | 9 (7)                      | 6 (10)                        | 5 (8)                  |         |
| Fair                            | 28 (21)                    | 14 (22)                       | 13 (20)                |         |
| Good                            | 60 (44)                    | 35 (56)                       | 37 (57)                |         |
| Excellent                       | 38 (28)                    | 8 (13)                        | 10 (15)                |         |
| <b>Meal Plan</b>                |                            |                               |                        | .34     |
| No                              | 108 (80)                   | 54 (86)                       | 49 (75)                |         |
| Yes                             | 27 (20)                    | 9 (14)                        | 16 (25)                |         |

## Conclusions

- Lack of food security is a serious issue among international students at the University of North Carolina at Chapel Hill, with nearly half reporting food insecurity or marginal food security.
- The characteristics identified in this study as being associated with food security status can help to inform future research and interventions for addressing food security status among international students.

## References

1. SEVIS. *SEVIS by the Numbers. Biannual Report on International Student Trends*. US Immigration and Customs Enforcement; 2019.
2. Coleman-Jensen A, Rabbitt MP, Gregory CA, Singh A. *Household Food Security in the United States in 2018*. U.S. Department of Agriculture, Economic Research Service; 2019.
3. Bruening M, Argo K, Payne-Sturges D, Laska MN. The struggle is real: A systematic review of food insecurity on postsecondary education campuses. *J Acad Nutr Diet* 2017;117(11):1767-1791.
4. Soldavini J, Berner M, Da Silva J. Rates of and characteristics associated with food insecurity differ among undergraduate and graduate students at a large public university in the Southeast United States. *Prev. Med. Rep.* 2019;14:100836.
5. Soldavini J, Berner M. The importance of precision: differences in characteristics associated with levels of food security among college students. *Public Health Nutr.* 2020;23(9):1473-1483.

## Funding Acknowledgement

This study was supported by a University of North Carolina at Chapel Hill Food for All micro-grant.

## Contact Information

Jessica Soldavini, MPH, RD, LDN  
 Jessica6@live.unc.edu
